1       **Title: IFNA pathway drives the more aggressive phenotype of *KRAS*<sup>G12D</sup>-**  
2       **mutant pancreatic ductal adenocarcinomas via IFNAR1/STAT3 activation**

3       **Authors:** Koetsu Inoue<sup>1,2,3,†</sup>, Daniel H. Schanne<sup>1,2,4,†</sup>, Aya Matsui<sup>1,2,5</sup>, Pinji Lei<sup>1,2</sup>, Sebastian  
4       Klein<sup>1,2,6,7</sup>, Shuichi Aoki<sup>1,2,3</sup>, Hajime Taniguchi<sup>1,2,3</sup>, Hiroto Kikuchi<sup>1,2,8</sup>, Jiang Chen<sup>1,2,9</sup>, Zelong  
5       Liu<sup>1,2</sup>, Shengdar Q. Tsai<sup>10</sup>, Tyge CE Schmidt<sup>1</sup>, Masaaki Iwasaki<sup>1</sup>, Glenn Geidel<sup>1,11</sup>, Alexander  
6       Koch<sup>1</sup>, Peigen Huang<sup>1,2</sup>, Dai Fukumura<sup>1,2</sup>, Toshihiro Shioda<sup>12</sup>, Lance L. Munn<sup>1</sup>, Carlos  
7       Fernandez-del Castillo<sup>13</sup>, Theodore S. Hong<sup>2</sup>, Rakesh K. Jain<sup>1,2</sup>, Andrew Liss<sup>13</sup>, Nabeel  
8       Bardeesy<sup>12</sup>, Dan G. Duda<sup>1,3,\*</sup>

9       **Affiliations:**

10       <sup>1</sup>Edwin L. Steele Laboratories for Tumor Biology, Massachusetts General Hospital, Harvard  
11       Medical School; Boston, USA.

12       <sup>2</sup>Department of Radiation Oncology, Massachusetts General Hospital, Harvard Medical School;  
13       Boston, USA.

14       <sup>3</sup>Department of Surgery, Tohoku Graduate School of Medicine; Sendai, Japan.

15       <sup>4</sup>Department of Radiation Oncology, Medical Center, University of Freiburg; Freiburg, Germany.

16       <sup>5</sup>Department of Anatomy and Developmental Biology, Tokyo Women's Medical University;  
17       Tokyo, Japan

18       <sup>6</sup>Institute of Pathology, University Hospital Cologne; Cologne, Germany.

19       <sup>7</sup>Else Kröner Forschungskolleg Clonal Evolution in Cancer, University Hospital Cologne;  
20       Cologne, Germany.

21       <sup>8</sup>Department of Surgery, Keio University School of Medicine; Tokyo, Japan.

22       <sup>9</sup>Department of General Surgery, Sir Run Run Shaw Hospital, Zhejiang University; Hangzhou,  
23       China.

24       <sup>10</sup>Department of Pathology, Massachusetts General Hospital, Harvard Medical School, Boston,  
25       USA.

26       <sup>11</sup>Department of Dermatology and Venereology, University Medical Center Hamburg-Eppendorf;  
27       Hamburg, Germany.

28       <sup>12</sup>Massachusetts General Hospital Center for Cancer Research and Harvard Medical School;  
29       Boston, USA.

30       <sup>13</sup>Department of Surgery, Massachusetts General Hospital, Harvard Medical School; Boston, USA.

31       \*Corresponding author. Email: [duda@steele.mgh.harvard.edu](mailto:duda@steele.mgh.harvard.edu)

32       †Equal contribution to this work.

33       **One Sentence Summary:** IFNA pathway drives the more aggressive phenotype of *KRAS*<sup>G12D</sup>-  
34       mutant pancreatic ductal adenocarcinomas via IFNAR1/STAT3 activation.

35 **Abstract:** Activating mutations of *KRAS* play critical roles in the initiation and progression of  
36 pancreatic ductal adenocarcinoma (PDAC). Accumulating evidence indicates that distinct *KRAS*  
37 alleles associate with different prognoses, but the underlying mechanisms are not known. We  
38 established isogenic *KRAS* mutants (*KRAS*<sup>G12D</sup>, *KRAS*<sup>G12V</sup>, and *KRAS*<sup>WT</sup>) using a *KRAS*<sup>G12R</sup>  
39 patient-derived PDAC cell line by CRISPR/Cas9 knock-in. We used these isogenic cell lines, a  
40 collection of characterized human PDAC patient-derived cell lines, and murine PDAC models to  
41 study the role of these *KRAS* alleles *in vitro* and *in vivo*. We verified that the growth of *KRAS*<sup>G12D</sup>  
42 cells is more aggressive compared to *KRAS*<sup>G12V</sup> isogenic cells *in vitro* and *in vivo* using orthotopic  
43 mouse models. Signal transducer and activator of transcription (STAT) activation was the most  
44 significant difference between *KRAS*<sup>G12D</sup> and *KRAS*<sup>G12V</sup> isogenic PDACs. Furthermore, activation  
45 of interferon-alpha (IFNA)/IFNA receptor (IFNAR)1/STAT3 signaling in the cancer cells  
46 mediated the more aggressive phenotype of *KRAS*<sup>G12D</sup> PDACs. Conversely, inhibition of IFNAR1  
47 in patient-derived PDAC cells suppressed tumor growth. Finally, IFNAR1 blockade was also  
48 effective in murine PDAC models and induced a significant increase in survival when combined  
49 with immune checkpoint blockade therapy. We conclude that the IFNA pathway and  
50 IFNAR1/STAT3 axis contribute to a more aggressive tumor progression in human *KRAS*<sup>G12D</sup>  
51 PDACs and that IFNAR1 inhibition is a potential therapeutic target for overcoming resistance to  
52 immunotherapy in PDAC.

## 53 INTRODUCTION

54 Pancreatic malignancies are the fourth most common cause of cancer-related death in the  
55 United States, with an increased incidence and continued unfavorable prognosis. The most  
56 aggressive and prevalent subtype—pancreatic ductal adenocarcinoma (PDAC)—has a 5-year  
57 overall survival rates of approximately 10% (1, 2). PDAC will become the second-leading cause  
58 of cancer-related death by 2030 (3). Significant clinical and preclinical research efforts over the  
59 last decades have resulted in a limited increase in long-term survival in PDAC patients so far (4).

60 One of the defining biological features of PDAC is an activating mutation of *KRAS*. More  
61 than 90% of PDACs carry a point mutation in codon 12 that leads to a switch of amino acids from  
62 glycine to aspartate (G12D, 51%), valine (G12V, 30%), or arginine (G12R, 12%) (5, 6). These  
63 events cause *KRAS* to be in a constitutively active state, which steers the affected cells towards a  
64 malignant phenotype (7). In PDAC, *KRAS* is one of the principal drivers of the disease through its  
65 involvement in signaling pathways that promote migration, cell proliferation, metabolism, and  
66 interaction with the tumor microenvironment (8-11). This understanding has led to major efforts  
67 to develop *KRAS* inhibitors. Recently, *KRAS*<sup>G12C</sup> inhibitors have shown promising anti-tumor  
68 efficacy (12, 13). However, only 1% of PDACs carry the *KRAS*<sup>G12C</sup> mutation (14). Effectively  
69 targeting more frequent mutations, such as *KRAS*<sup>G12D</sup>, remains an unmet need.

70 Several clinical studies have investigated whether different *KRAS* mutations are  
71 associated with distinct clinical PDAC outcomes (15). In a recently reported phase 1/2 study of  
72 neoadjuvant radio-chemotherapy in 50 patients with resectable PDAC, we found a statistically  
73 significant lower overall survival (OS) in patients with *KRAS*<sup>G12D</sup> tumors compared to other  
74 mutations or wild-type *KRAS* (16). In another study, Ogura *et al.* screened a group of 242 biopsies  
75 from unresectable PDACs patients. They found that the patients with *KRAS*<sup>G12D</sup> PDACs and

76 *KRAS*<sup>G12R</sup> mutations had a worse prognosis (17). Finally, a more recent study of 219 European  
77 patients with advanced PDAC showed the same association between *KRAS*<sup>G12D</sup> mutation and  
78 shorter OS (18). Thus, characterizing the biological consequences of different *KRAS* mutations  
79 could provide new insights into tumor pathophysiology and reveal specific vulnerabilities in  
80 PDAC and in other tumors with frequent *KRAS* mutations, such as colon and non-small cell lung  
81 cancer. Based on these data, we hypothesized that the type of *KRAS* mutation differentially  
82 mediates tumor progression and treatment resistance.

83         This hypothesis could not be directly tested previously. Previous preclinical studies used  
84 xenograft-derived cell lines or animal models carrying a *KRAS*<sup>G12D</sup> mutation. However, these cell  
85 lines may carry multiple genetic or epigenetic alterations, making it difficult to precisely identify  
86 how various biological features associate with distinct *KRAS* mutations. To address this limitation,  
87 we generated isogenic PDAC patient-derived cells via CRISPR/Cas9 knock-in. These well-  
88 defined, genetically engineered models served as a platform to study the role of different *KRAS*  
89 mutations, along with a panel of other patient-derived PDAC cell lines and murine models. Using  
90 these models, we evaluated PDAC growth *in vitro* and *in vivo*, examined the causality between  
91 changes in downstream targets, and studied the impact of targeting them, genetically and  
92 pharmacologically, in orthotopic models of PDAC in mice.

## 93 **RESULTS**

### 94 **Isogenic cell lines with different *KRAS* alleles show differential growth rates *in vitro* and *in*** 95 ***vivo***

96 To determine whether the *KRAS* allele type mediates PDAC progression, we first generated  
97 isogenic cell lines from the PDX-derived cell line (PDCL)-1108, which harbored a *KRAS*<sup>G12R</sup>  
98 mutation. Briefly, we introduced Cas9 protein along with sgRNA's targeting *KRAS* exon 2 and

99 single-stranded DNA donor templates coding for alternative *KRAS* alleles (*KRAS*<sup>WT</sup>, *KRAS*<sup>G12D</sup>,  
100 and *KRAS*<sup>G12V</sup>); we then analyzed single-cell clones for successful integration by restriction digest,  
101 Sanger sequencing and deep sequencing (**Figs. 1A & S1**).

102 To assess whether the isogenic cell lines exhibit differential growth rates *in vitro* and *in vivo*, we  
103 performed 2-D and 3-D proliferation assays and evaluated tumor progression in orthotopic PDAC  
104 mouse models. *KRAS*<sup>G12D</sup> cells showed enhanced proliferation capacity compared to *KRAS*<sup>G12V</sup> and  
105 *KRAS*<sup>WT</sup> *in vitro* (**Fig. S2**). Moreover, orthotopically grafted *KRAS*<sup>G12D</sup> cells showed an accelerated  
106 tumor growth rate and the mice had shorter survival than those implanted with other mutants or  
107 wild-type tumors *in vivo* (**Fig. 1B-D**). The difference was most significant and reproducible when  
108 comparing *KRAS*<sup>G12D</sup> and *KRAS*<sup>G12V</sup> PDAC cells in the orthotopic model in mice. Thus, we focused  
109 our further studies on these two *KRAS* alleles.

#### 110 **Isogenic cell lines with different *KRAS* alleles show similar levels of expression of *KRAS* and** 111 **downstream targets, and comparable sensitivity to MAPK or PI3K inhibition**

112 Because previous reports showed that *KRAS* copy number gain is associated with outcome in  
113 human PDAC (7, 19), we next checked *KRAS* expression levels between the isogenic cell lines.  
114 We found no significant differences (**Fig. S3A**). We further assessed whether different *KRAS* allele  
115 types have differential phosphorylation of canonical downstream targets such as ERK or AKT by  
116 Western blotting (20, 21). We found no significant differences between the isogenic cell lines (**Fig.**  
117 **S3B-D**). In addition, it has been reported that different *KRAS* alleles may have differential  
118 sensitivity to MEK inhibitors (19). Therefore, we checked drug sensitivity to BRAF, MEK, ERK,  
119 and PI3K inhibitors. We found no significant differences in drug sensitivity among isogenic cell  
120 lines (**Fig. S3E-H**). These results indicate that non-canonical mechanisms may contribute to the  
121 differential tumor progression between isogenic PDCLs with different *KRAS* alleles.

122 **STAT3 is activated, and STAT1 is suppressed in *KRAS*<sup>G12D</sup> PDACs**

123 To reveal differentially activated pathways in PDCLs with distinct *KRAS* alleles *in vivo*, we  
124 performed bulk-tissue RNA sequencing (RNA-seq). Analysis was performed using size-matched  
125 *KRAS*<sup>G12D</sup> (n=3) and *KRAS*<sup>G12V</sup> (n=3) tumor samples, all collected when the tumors reached 8mm  
126 in diameter. Gene Set Enrichment Analysis (GSEA) showed that “*regulation of peptidyl serine*  
127 *phosphorylation of STAT protein*” was the most significantly enriched gene set in the *KRAS*<sup>G12D</sup>  
128 compared to *KRAS*<sup>G12V</sup> tumors (**Fig. 2A, B**). The heatmap of the “*regulation of peptidyl serine*  
129 *phosphorylation of STAT protein*” gene set indicated upregulated expression levels of *IFNA1* and  
130 *IFNA13* in the *KRAS*<sup>G12D</sup> tumors (**Fig. 2C**). We validated that *KRAS*<sup>G12D</sup> PDCLs had higher  
131 *IFNA13* expression *in vitro* and *in vivo* by real-time qPCR (**Fig. 2D**).

132 We next examined STAT1 and STAT3 activation, which are activated downstream IFNA (22-24).  
133 Western blotting analysis showed the increased STAT3 activation in the *KRAS*<sup>G12D</sup> versus  
134 *KRAS*<sup>G12V</sup> PDX PDAC tissues (**Fig. 2E**). Moreover, STAT3 activation was verified using a panel  
135 of *KRAS*<sup>G12D</sup> versus *KRAS*<sup>G12V</sup> PDX PDAC cells (**Fig. S4**). Exposure to exogenous recombinant  
136 human (rh)IFNA confirmed activation of both STAT1 and STAT3 at high concentrations (**Fig.**  
137 **2F**).

138 STAT1 and STAT3 activation could be reciprocally regulated and have opposing effects on tumor  
139 progression (25, 26). Our results showed that increased IFNA expression in *KRAS*<sup>G12D</sup> PDAC cells  
140 associated with more rapid tumor progression, activation of STAT3, and suppression of STAT1  
141 activation. To further confirm these findings, we conducted a gene ontology (GO) annotation of  
142 the significantly differentially expressed genes between *KRAS*<sup>G12D</sup> and *KRAS*<sup>G12V</sup> PDACs (see  
143 details in **Methods**). We found that GO terms related to STAT1 signaling, including *response to*  
144 *virus*, *defense response to virus*, *type I IFN signaling pathway*, and *cellular response to IFNA*,

145 were all enriched in *KRAS*<sup>G12V</sup> PDACs (**Fig. S5A**). We also validated the results of the RNA-seq  
146 analysis for genes involved in “*response to virus*”, including IFIT2 and IFIT3, utilizing real-time  
147 PCR (**Fig. S5B-C**). In addition, we found that TRAIL, a downstream gene for STAT1 signaling,  
148 was among the top 5 differentially expressed genes (DEG) (**Fig. S5D**) and further verified its  
149 increased expression in *KRAS*<sup>G12V</sup> tumors by real-time qPCR (**Fig. S5E**). These results show  
150 activation of STAT1 signaling in *KRAS*<sup>G12V</sup> compared to *KRAS*<sup>G12D</sup> PDACs.

151 The STAT3 pathway leads to downstream NF-κB activation (27). We found that NF-κB activation  
152 in *KRAS*<sup>G12D</sup> PDAC tissues by Western blotting (**Fig. S5F**). Taken together, our studies of isogenic  
153 PDCLs show that STAT3 is activated and STAT1 is suppressed in the more aggressive *KRAS*<sup>G12D</sup>  
154 PDACs relative to the more indolent *KRAS*<sup>G12V</sup> isogenic tumors (**Fig. 2G**).

155 **Genetic inhibition of IFNAR1 delays tumor progression in both *KRAS*<sup>G12D</sup> and *KRAS*<sup>G12V</sup>**  
156 **PDACs, and exogenous rhIFNA accelerates *KRAS*<sup>G12V</sup> tumor growth**

157 The IFNA/STAT1 axis may have inhibitory (28, 29) or promoting effects on tumor progression  
158 (30, 31). Thus, we next established IFNAR1-knock-down (KD) versions of the isogenic PDCLs  
159 to determine the role of the IFNA/STAT pathway in the PDAC models (**Fig. 3A**).

160 We first confirmed that genetic IFNAR1 inhibition suppressed both the constitutive activation of  
161 STAT1 and STAT3 and that induced by rhIFNA, in both *KRAS*<sup>G12D</sup> and *KRAS*<sup>G12V</sup> IFNAR1-KD  
162 PDCLs (**Fig. S6A**). When we orthotopically implanted these PDCLs, we found that IFNAR1  
163 inhibition delayed tumor growth and improved survival in both *KRAS*<sup>G12D</sup> and *KRAS*<sup>G12V</sup> IFNAR1-  
164 KD isogenic PDCL models (**Figs. 3B and S6B-C**).

165 Next, we conducted a separate time-matched study and assessed STAT activation in the tumor  
166 tissues. We found that IFNAR1 inhibition suppressed the activation of STAT3 and promoted  
167 STAT1 phosphorylation (**Figs. 3C-D**). In addition, genetic IFNAR1 inhibition suppressed NF-κB

168 activation in *KRAS*<sup>G12D</sup>/IFNAR1-KD tumors (**Fig. 3E**). Although IFNA may activate ERK and  
169 AKT in cancer (32), IFNAR1 inhibition did not affect ERK and AKT activation in  
170 *KRAS*<sup>G12D</sup>/IFNAR1-KD PDACs (**Fig. S7A-B**). We further evaluated STAT1 downstream genes by  
171 real-time qPCR. We found significant upregulation of TRAIL and other genes related to STAT1  
172 signaling in IFNAR1-KD tumors, but not ERK (**Figs. 3F and S7C**). We also checked the effect of  
173 pharmacologic blockade with an anti-human IFNAR antibody *in vitro*. In line with data from the  
174 genetic approach, we found that blockade using an anti-human IFNAR antibody abolished STAT1  
175 and STAT3 activation in both cell types (**Fig. S7D**). In addition, IFNAR antibody treatment  
176 reduced PDAC cell viability *in vitro* (**Fig. S7E**). These results show that IFNAR1 promotes tumor  
177 progression via STAT3/NF- $\kappa$ B activation and not via STAT1 activation in the *KRAS*<sup>G12D</sup> PDACs.  
178 Previous preclinical studies showed that rhIFNA treatment could suppress tumor growth (33, 34).  
179 However, when tested in clinical trials, combining rhIFNA with chemotherapy did not show  
180 benefits in PDAC patients (35-38). Thus, we treated mice bearing established orthotopic *KRAS*<sup>G12D</sup>  
181 or *KRAS*<sup>G12V</sup> PDAC tumors with rhIFNA or vehicle (sodium chloride solution) and examined the  
182 effect on mouse survival. Consistent with the clinical observations, we found no survival  
183 advantage in mice treated with rhIFNA, irrespective of *KRAS* allele type (**Fig. S8A,B**). Moreover,  
184 median OS in the rhIFNA-treated mice bearing *KRAS*<sup>G12V</sup> PDAC tended to be shorter (by 10.5  
185 days) compared to control-treated mice (85.5 days versus 96 days) (**Fig. S8B**) (p=0.061). These  
186 results show that IFNAR1 inhibition can delay tumor progression in both *KRAS*<sup>G12D</sup> and *KRAS*<sup>G12V</sup>  
187 models primarily via STAT3 suppression and suggest that reduced IFNA mediates the more  
188 indolent behavior of *KRAS*<sup>G12V</sup> tumors compared to those that are more aggressive *KRAS*<sup>G12D</sup> (**Fig.**  
189 **3G**).

190 **STAT3 overexpression promotes tumor progression across *KRAS* mutated PDAC subtypes**



191 We next tested the role of the IFNA/STAT3 axis in driving tumor progression. We first examined  
192 induced STAT3 overexpression in *KRAS*<sup>G12D</sup> IFNAR1-KD cells (**Fig. 4A**). When we  
193 orthotopically implanted these tumor cells in mice, STAT3 overexpression reversed the inhibition  
194 of tumor growth (**Fig. 4B**).

195 Next, we evaluated total and phosphorylated STAT3 levels in separate time-matched studies and  
196 confirmed their overexpression in STAT3C/IFNAR1-KD tumors, and p-NF-κB upregulation (**Fig.**  
197 **4C and S9**). To verify that the IFNA/STAT3 axis mediated the differential tumor growth rate  
198 between *KRAS*<sup>G12D</sup> and *KRAS*<sup>G12V</sup> PDCL, we examined whether STAT3 overexpression also  
199 rescues the delayed tumor progression in *KRAS*<sup>G12V</sup> PDCL. Indeed, STAT3 overexpression in  
200 *KRAS*<sup>G12V</sup> cells accelerated tumor progression in the orthotopic PDAC model (**Fig. 4D-E**).

201 We also tested whether STAT1 inhibition in IFNAR1-KD PDAC cells affects tumor growth by  
202 generating double knock-down lines for both IFNAR1 and STAT1 (**Fig. S10A**). We found no  
203 significant difference in tumor growth or mouse survival after orthotopic implantation of these  
204 PDAC cells (**Fig. S10B**). Consistent with these results, pharmacologic inhibition of STAT1 with  
205 fludarabine or the Janus kinase (JAK) 1/2 inhibitor ruxolitinib (Javaki) did not affect the viability  
206 of *KRAS*<sup>G12D</sup> or *KRAS*<sup>G12V</sup> cells *in vitro* (**Fig. S10C**). These results support the conclusion that the  
207 IFNAR1/STAT3 axis plays a critical role in PDAC and mediates the accelerated tumor growth in  
208 *KRAS*<sup>G12D</sup> versus *KRAS*<sup>G12V</sup> isogenic PDCL cells (**Fig. 4F-G**).

209 **IFNAR1 induces more aggressive growth in human *KRAS*<sup>G12D</sup> PDAC models, and high levels**  
210 **associated with shorter survival in PDAC patients**

211 To confirm that *KRAS*<sup>G12D</sup> reproducibly shows higher IFNA expression level and STAT3  
212 activation, we evaluated their expression across multiple PDX tumors. Analysis of RNA-seq data  
213 from 25 independent PDX tumors showed higher levels of IFNA in PDX tissues from PDAC with

214 *KRAS*<sup>G12D</sup> mutation, which were significant for *IFNA13* expression (**Fig. 5A**). In addition, an  
215 immunohistochemical evaluation showed higher levels of p-STAT3 in *KRAS*<sup>G12D</sup> PDX tumor  
216 tissues (**Fig. 5B-C**). To evaluate whether IFNAR1 promotes tumor growth in these PDX models,  
217 we selected two PDACs based on differential IFNAR1 expression: PDCL-1319 (high levels) and  
218 (low levels) (**Fig. 5D**). PDCL-1319 and PDCL-609 *KRAS*<sup>G12D</sup> cells had similar IFNA1 and  
219 IFNA13 expression levels (**Fig. S11A**). Moreover, we confirmed increased activation of STAT1  
220 and STAT3 in response to IFNA in the cells with higher levels of IFNAR1 expression (PDCL-  
221 1319) (**Fig. 5E**). We next tested the effect of IFNAR1-KD in these PDCLs (**Fig. 5F**) to determine  
222 the impact of genetic IFNAR1 inhibition on STAT activation and tumor growth. Western blot  
223 analysis showed inhibition of STAT1 and STAT3 activation in PDCL-1319 IFNAR1-KD and  
224 PDCL-609 IFNAR1-KD cells (**Fig. S11B**). Furthermore, genetic IFNAR1 inhibition repressed  
225 tumor growth significantly in orthotopic PDAC mouse models (**Fig. 5G-H**). The inhibitory effects  
226 were more pronounced in the PDCL-1319 (high-IFNAR1) model.

227 Finally, we examined the correlation between OS and IFNAR1 expression in PDAC tissues by  
228 mining the TCGA database (n=178) using the GEPIA tool (39). Consistent with our data, tumor  
229 IFNAR1 expression levels below median associated with significantly longer OS in PDAC  
230 patients (**Fig. S11C**). These results further demonstrate that IFNAR1 expression in PDAC cells  
231 mediates a more aggressive tumor growth.

### 232 **IFNAR1 inhibition inhibits murine *Kras*<sup>G12D</sup> PDAC growth in immunocompetent mice**

233 Because downstream STAT1 and STAT3 are known to mediate immune responses (23, 40, 41),  
234 we next evaluated the impact of IFNAR1 inhibition in a *Kras*<sup>G12D</sup> mutant murine PDAC model  
235 (AK4.4 cells) (42, 43). Similar to *KRAS*<sup>G12D</sup> human PDCLs, AK4.4 murine PDAC cells had high  
236 IFNAR1 expression levels by Western blotting (**Fig. S12A**). Next, we generated IFNAR1-KD

237 AK4.4 cells (**Fig. S12B**). We verified the suppressed STAT activation induced by recombinant  
238 mouse IFNA in these cells (**Fig. S12C**), similar to pharmacologic blockade with an anti-mouse  
239 IFNAR1 antibody in parental AK4.4 cells (**Fig. S12D**). Orthotopic implantation of IFNAR1-KD  
240 AK4.4 cells in immunocompetent FVB mice showed that genetic IFNAR1 inhibition significantly  
241 delayed murine PDAC growth (**Fig. S12E-F**). However, genetic IFNAR1 did not control  
242 malignant pleural effusion and, as a result, tumor growth delay did not translate into improved  
243 mouse survival as mice died primarily due to malignant pleural effusion (data not shown). As in  
244 the human PDAC models, we found that IFNAR1 inhibition did not affect tumor growth in a  
245 murine *Kras*<sup>G12D</sup> PDAC model with low IFNAR1 expression level (KPC cells) (data not shown).

246 **Blocking IFNAR1 delays tumor growth and enhances the efficacy of immune checkpoint**  
247 **blockade (ICB) therapy in *Kras*<sup>G12D</sup> murine PDAC**

248 Beyond the differential PDAC cell-autonomous effects, downstream STAT3 induces  
249 immunosuppression in the tumor microenvironment, while STAT1 activation promotes anti-tumor  
250 immunity (23, 40, 41). In addition, IFNAR1 is expressed on malignant, stromal, and immune cells  
251 in human PDAC (**Fig. S12G**) (45). To reveal the effect of systemic/global blockade of IFNAR1  
252 on tumor growth and response to immunotherapy, we examined the efficacy of anti-mouse  
253 IFNAR1 antibody treatment alone or with dual anti-PD1/CTLA4 antibody ICB therapy in the  
254 orthotopic AK4.4 murine PDAC model in immunocompetent mice. We found that anti-mouse  
255 IFNAR1 antibody alone and combined with ICB therapy, but not ICB therapy alone, significantly  
256 delayed tumor growth compared to control in this PDAC model (**Fig. 6A-B**). Moreover,  
257 combination therapy significantly increased median OS compared to control and each treatment  
258 alone (**Fig. 6C**). Of note, combination therapy significantly reduced the formation of malignant  
259 pleural effusions (**Fig. S13A**). We repeated the experiment and sacrificed the mice in a time-

260 matched manner to examine the effects of combination treatment on target modulation and CD8<sup>+</sup>  
261 effector T cell infiltration. We collected tumor tissues after eight days of treatment and assessed  
262 STAT1, STAT3 and NF-κB activation (**Figs. 6D** and **S13B-D**). Western blotting analyses  
263 demonstrated suppression of both STAT3 and NF-κB in PDAC tissues after anti-IFNAR1 antibody  
264 treatment (**Fig. S13B**). In contrast, ICB alone did not affect STAT activation (**Fig. S13C**).  
265 Consistently, combination therapy suppressed the activation of STAT3 and NF-κB compared to  
266 control and ICB groups (**Figs. 6D** and **S13D**). In this model, the anti-IFNAR1 antibody treatment  
267 did not activate STAT1 via STATs cross-regulation, highlighting the more critical role of STAT3  
268 in tumor response to anti-IFNAR1 blockade alone or combined with ICB.  
269 Previous reports have shown that anti-IFNAR1 antibody inhibits T cell exhaustion and  
270 immunosuppression in viral infections through increased IFN-γ production (46, 47). Thus, we  
271 measured the IFN-γ expression level in the murine PDACs. We found increased IFN-γ levels after  
272 anti-IFNAR1 antibody treatment alone and in combination with ICB in the tumor tissues, but not  
273 after ICB alone (**Fig. S13E**). In addition, we measured the infiltration by CD8<sup>+</sup> T cells in tumor  
274 tissue by immunofluorescence (IF). Consistent with the efficacy data, we found that combination  
275 therapy significantly increased the number of CD8<sup>+</sup> T cells in PDAC tissue (**Fig. 6E-F**). These  
276 results show that INFAR1 blockade enhances CD8<sup>+</sup> T cell infiltration and anti-PD1/CTLA4  
277 immunotherapy efficacy in *Kras*<sup>G12D</sup> murine PDAC (**Fig. 6G**).

## 278 **DISCUSSION**

279 Although activating mutations in the *KRAS* gene are present in most PDACs, the  
280 mechanisms underlying the aggressive progression of *KRAS*<sup>G12D</sup> PDACs remained obscure. In the  
281 current study, we created isogenic cell lines developed using CRISPR/Cas9 technology to  
282 reproduce the clinical behavior of these tumors and shed light on the underlying mechanisms.

283 Surprisingly, we found that the IFNAR1/STAT3 axis, and not differential activation of canonical  
284 targets such as MAPK or PI3K pathways, mediates the more aggressive progression of *KRAS*<sup>G12D</sup>  
285 versus *KRAS*<sup>G12V</sup> PDACs.

286 IFNA belongs to the group of type I interferons, which mediate resistance to viral  
287 infections, promote antitumor activity, and modulate immune responses (27). Therefore, IFNA has  
288 been used as an anti-tumor drug in renal cell carcinoma and melanoma (48). Once secreted by cells,  
289 it binds to the same ubiquitous hetero-dimeric transmembrane receptor (IFNAR1/IFNAR2). Then,  
290 it activates canonical and non-canonical JAK/STAT signaling, which subsequently affects many  
291 genes (49). While most published reports showed that IFNA has anti-tumor activity, some papers  
292 revealed that IFNA could have a pro-tumor effect (31, 50). Since IFNA leads to cell type and  
293 context dependent patterns of interferon-stimulated gene expression via STAT modulation, IFNA  
294 might have dual functions (anti-tumor and pro-tumor) (51). Although some *in vivo* studies reported  
295 that rhIFNA could regulate PDAC tumor growth and enhance chemotherapy (33, 34), clinical trials  
296 testing combinations of IFNA with chemotherapy failed to show efficacy in unselected PDAC  
297 patient populations (35-38).

298 To determine whether and how the IFNA pathway promotes or regulates tumor  
299 progression in PDAC subsets, we conducted survival studies in loss or gain of function  
300 experiments (using genetic IFNAR1 knockdown in PDAC cells versus rhIFNA treatment). While  
301 IFNAR1 inhibition impeded PDAC progression, rhIFNA treatment showed a tendency for more  
302 aggressive tumor growth. Because STAT1 and STAT3 are downstream of IFNA signaling, we  
303 evaluated STAT1/3 activation status in these tumors. We found that STAT3 was activated while  
304 STAT1 was suppressed in *KRAS*<sup>G12D</sup> versus isogenic *KRAS*<sup>G12V</sup> PDACs. Since STAT1 and STAT3  
305 may have opposing functions and have balanced expression through cross-regulation (22, 25, 41),

306 we anticipated that constitutive STAT3 activation downstream IFNAR1 suppressed STAT1.  
307 Consistent with our hypothesis, when we inhibited IFNAR1, STAT3 was suppressed, and STAT1  
308 was activated in *KRAS*<sup>G12D</sup> PDAC cells. By establishing STAT3 overexpression models, we  
309 demonstrate its critical role downstream IFNAR1 as evidenced by successful tumor growth rescue  
310 studies in IFNAR1 knockdown *KRAS*<sup>G12D</sup> and *KRAS*<sup>G12V</sup> PDAC cells. The conclusion that STAT3  
311 mediates IFNAR1-mediated PDAC growth is further supported by results in double knockdown  
312 for STAT1 and IFNAR1, which showed no differences in survival.

313 A role for the IFNA pathway and STAT3 in promoting tumor progression has been  
314 proposed in inflammatory breast cancer (IBC) (52). IFNA activation of STAT3 can promote anti-  
315 apoptotic processes via PI3K/AKT signaling stimulation (53). These studies suggested that chronic  
316 inflammation in tumors may contribute to preferential activation of STAT3 versus STAT1. PDACs  
317 are often associated with severe chronic inflammation. Indeed, we discovered that IFNAR1  
318 blockade suppressed STAT3 and activated STAT1 in PDAC, thus delaying tumor growth, in  
319 contrast to rhIFNA treatment. Several lines of evidence support our findings. Mining of the TCGA  
320 database showed that IFNAR1 expression is negatively correlated with OS. We further  
321 demonstrate that genetic and pharmacologic inhibition of IFNAR1 delays tumor progression and  
322 is dependent on INFAR1 expression levels.

323 Finally, we also investigated the impact of IFNAR1 blockade on murine PDAC models  
324 in immunocompetent mice, since it has been reported that STAT1 activation enhances anti-tumor  
325 immunity and conversely, STAT3 promotes an immunosuppressive environment (23, 40, 41).  
326 Moreover, we tested the impact on immunotherapy since PDACs are notoriously resistant to ICB.  
327 We found that IFNAR1 blockade delayed tumor growth and enhanced the efficacy of ICB therapy.  
328 While counterintuitive, these results are supported by reports from the field of infectious diseases.

329 Type I IFN signaling is activated by chronic virus infection and causes an immunosuppressive  
330 environment. In addition, anti-IFNAR1 antibody alleviates T cell exhaustion and  
331 immunosuppression through IFN- $\gamma$  production (46, 47). These results indicate that anti-IFNAR1  
332 antibody treatment can result in immune activation. Indeed, we found that IFN- $\gamma$  was upregulated  
333 by anti-IFNAR1 antibody treatment and increased the number of tumor-infiltrating CD8<sup>+</sup> T cells  
334 in the PDAC microenvironment.

335 In summary, we demonstrate that the IFNAR1/STAT3 axis is a driver of PDAC  
336 progression and mediates the more aggressive phenotype of *KRAS*<sup>G12D</sup> mutant PDACs. Moreover,  
337 blockade of IFNAR1 enhanced the efficacy of immunotherapy in an aggressive *Kras*<sup>G12D</sup> murine  
338 PDAC model in syngeneic mice. Since the anti-human IFNAR1 antibody anifrolumab is FDA  
339 approved for systemic lupus erythematosus and is currently under clinical development for other  
340 inflammatory disease, our results indicate that this strategy should be tested in combination with  
341 ICBs in future clinical studies in this intractable disease.

## 342 MATERIALS AND METHODS

343 **Cells and cell culture.** We studied low-passage PDAC patient-derived xenograft (PDX) cell lines  
344 (PDCL-1108, -1319 and -609) and a collection of 25 PDXs established in the Department of  
345 Surgery from patients treated at Massachusetts General Hospital (MGH). The murine PDAC cell  
346 line AK4.4 (*Kras*<sup>G12D</sup>*p53*<sup>+/-</sup>) was established from a tumor induced in a Ptf1-Cre/LSL-  
347 *Kras*<sup>G12D</sup>/*p53*<sup>Lox/+</sup> mouse (54). The murine PDAC cell line KPC (*Kras*<sup>G12D</sup> and *p53*<sup>+/-</sup>) was kindly  
348 provided by Dr. Saluja (Department of Surgery, University of Minnesota Medical School); it was  
349 established from a tumor induced in an LSL-*Kras*<sup>G12D</sup>/LSL-*Trp53*<sup>R127H</sup>/Pdx1-Cre mouse (55).

350 **Generation of isogenic PDCLs.** To maximize genetic similarity, a cell line derived from a single-  
351 cell clone of PDCL-1108 was used for generation of CRISPR/Cas9 models. We designed spCas9  
352 guide RNAs to target codon 12 of the human *KRAS* gene and selected the one with highest  
353 targeting efficiency determined by T7E1 mismatch assay (EnGen Mutation Detection Kit, New  
354 England Biolabs, Ipswich, MA). Truncated guide RNA was produced by PCR assembly of a guide  
355 RNA template (56, 57), followed by T7 *in vitro* transcription using the HiScribe T7 In Vitro  
356 Transcription Kit (New England Biolabs, Ipswich, MA) and purification with Trizol  
357 (ThermoFisher Scientific, Waltham, MA) according to the manufacturer's protocols. Single-  
358 stranded oligo- deoxynucleotide (ssODN) sequences coding for the desired mutations (G12R,  
359 G12V, G12D and G12 wild type) and a silent restriction site (HindIII) for screening purposes were  
360 designed with ~ 80 bp- homology arms flanking each side of the Cas9-induced double-strand break.  
361 For transient transfection, 1 x 10<sup>6</sup> PDCL-1108 cells were electroporated with 10 µg spCas9-NLS  
362 protein (New England Biolabs, Ipswich, MA), 4 µg guide RNA and 200 pmol ssODN using the  
363 Amaxa Nucleofector II (Lonza, Basel, Switzerland). Cells were recovered in growth medium for  
364 24 hr and then sorted as single cells into 96-well plates by FACS. After colony formation, clones



365 were screened using end-point PCR and restriction digest, followed by verification of successful  
366 editing with Sanger sequencing and targeted next-generation sequencing (CRISPR sequencing,  
367 MGH DNA core, Cambridge, MA).

368 **Orthotopic PDAC models in mice.** We used nonobese diabetic/severe combined  
369 immunodeficiency/gamma (NSG) as well as NSG-human-HGF-knock-in (NOD.Cg-  
370 *Hgf<sup>tm1.1(HGF)Aveo</sup> Prkdc<sup>scid</sup> Il2rg<sup>tm1Wjl/J</sup>*) mice (Jackson Labs) for PDCLs, and FVB and C57Bl/6  
371 mice (Jackson Labs) for AK4.4 and KPC murine PDAC cell lines, respectively. All experimental  
372 mice were bred and maintained in our gnotobiotic animal colony. All surgical procedures were  
373 performed under sterile conditions in a laminar-flow hood. Orthotopic pancreatic tumors were  
374 generated by implanting  $1 \times 10^5$  cells into the pancreas of 6-8 weeks old mice (58). All experimental  
375 use of animals followed the Public Health Service Policy on Humane Care of Laboratory Animals  
376 and the protocol was approved by the institutional animal care and use committee (IACUC) at  
377 MGH.

378 Orthotopic tumor growth and treatment responses were monitored by ultrasound imaging in mice.  
379 For survival studies, mice were monitored and euthanized when the clinical endpoint was reached,  
380 i.e., when mice became moribund. For treatment studies, we randomized mice and started  
381 treatment when tumors reached 4-5 mm in diameter. For time-matched studies, we sacrificed the  
382 mice and collected tumor tissues when the largest tumor reached 8-9 mm in diameter. Anti-mouse  
383 IFNAR1 (clone MAR1-5A3, 10 mg/kg on first dose and 5 mg/kg for the following 5 doses, every  
384 3 days), anti-mouse CTLA-4 (clone 9D9, 10 mg/kg, 3 doses, every 3 days) and anti-mouse PD-1  
385 antibodies (clone RMP1-14, 10 mg/kg, 6 doses, every 3 days) were purchased from BioXcell. All  
386 drug treatments were administered intraperitoneally (i.p.).

387 **Cell proliferation assays.** To analyze viability, cells were seeded onto 96-well plates (n=8 wells).  
388 Cells were incubated at 37°C and 5% CO<sub>2</sub>. Cell proliferation was assessed based on the  
389 colorimetric MTT assay according to the manufacturer's protocol. To evaluate the cell viability in  
390 3-D culture conditions, we used NanoCulture Plates (ORGANOGENIX, Japan). We seeded cells  
391 (5 x 10<sup>3</sup> cells/100µl) in each well under serum starvation. Cell viability was assessed using  
392 CellTiter-Glo assay (Promega, WI) 10 days after cell seeding.

393 **RNA sequencing analyses.** Total RNA was extracted from tumor tissues using Qiagen kits. The  
394 quality control of total RNA, library preparation and sequencing were performed at the Molecular  
395 Biology Core Facilities, Dana Farber Cancer Institute (Boston, MA) with single-end 75 bp mode.  
396 Cutadapt was employed to remove the low-quality bases and adapter contamination. Next, Hisat2  
397 was used to align the reads to the reference genome, with default alignment options and mm10 for  
398 mouse reference genome and hg38 for human reference genome (59-61). After mapping, samtools  
399 (62) was used to transfer SAM files to BAM files, and sort and build the index of BAM files.  
400 HTSeq-count (63) was employed to generate the count matrix. After that, edgeR (64, 65) was used  
401 to calculate the differentially expressed genes with cutoff of  $|\log(\text{fold change})| > 1$  and p value <  
402 0.001. Gene ontology functional annotation was performed by the DAVID database  
403 (<https://david.ncifcrf.gov>) (66, 67). GSEA analysis was performed using GSEA software  
404 (<https://www.gsea-msigdb.org/gsea/index.jsp>) with MSigDB C2 KEGG pathway and C5 Gene  
405 ontology gene sets as references.

406 **Quantitative real-time reverse transcription polymerase chain reaction (qPCR).** Total RNA  
407 was isolated using RNeasy Mini Kit (Qiagen Inc.) and measured by nanodrop (ThermoFisher).  
408 qPCR was performed using iTaq Universal SYBR Green Supermix (Bio-Rad, Inc.). GAPDH was  
409 used as the housekeeping gene. qPCR was done at the annealing temperature of 60°C (see

410 **Supplemental Table S1** for primers). The relative mRNA level was calculated by the  $2^{-\Delta\Delta CT}$   
411 method.

412 **Protein extraction and Western blotting.** The cultured cells and tissues were lysed in RIPA  
413 buffer. For immunoblotting, the cell lysates were loaded on 8% sodium dodecyl sulfate (SDS)-  
414 polyacryl-amide gels with equal amounts of protein (10  $\mu$ g) per well and transferred to PVDF  
415 membranes. The membranes were blocked using 2% FBS solution in PBS for 1 hr at room  
416 temperature. Then, they were incubated with primary antibodies overnight (**Supplemental Table**  
417 **S1**). Signal detection was performed by Clarity Western ECL Substrate (Bio-Rad) according to  
418 the manufacturer's instructions. These data were quantified using ImageJ (US NIH). Value  
419 indicates ratio of target protein to  $\beta$ -actin.

420 **DNA transfection and lentivirus transduction.** shRNA-knockdown experiments were  
421 performed using pLKO.1 puro/neo-based lentiviruses (**Supplemental Table S2**). Briefly, 293T  
422 cells were seeded ( $3 \times 10^5$  cells/well) in 6 well dishes 24 hr before transfection. pLKO shRNA-  
423 DNA was transfected with psPAX2 packaging and pMD2.G envelop plasmid using Fugene  
424 reagent (Promega) according to the manufacturer's instructions. Viral supernatant was harvested  
425 24 and 48 hr after transfection and filtered through 0.45  $\mu$ m filters. PDAC cells were infected with  
426 lentivirus expressing shRNA. After 24 hr, cells were selected by puromycin/neomycin. *In vivo* and  
427 *in vitro* experiments were performed 7-10 days after infection. For the STAT3 overexpression  
428 model, we used STAT3C lentiviral plasmid and control GFP plasmid purchased from Addgene  
429 (**Supplemental Table S2**). STAT3C carries a mutation that constitutively activates STAT3. Virus  
430 was harvested and filtered as described above. Seven days after infection, GFP-positive cells were  
431 sorted by FACS.

432 **Immunohistochemical staining (IHC).** All sections were deparaffined with xylene and hydrated

433 with graded alcohols. After that, for the antigen retrieval, they were boiled at 97°C in 1 mM EDTA  
434 for 20 min and cooled at RT until 37°C. Tissue sections were washed with DW and then treated  
435 serially with 3% H<sub>2</sub>O<sub>2</sub> solution (RT, 10 min), avidin solution (RT, 15 min), and biotin solution  
436 (RT, 15 min). Sections were washed briefly with PBS after each blocking step. After washing in  
437 PBS-T (5 min x 2), sections were treated with 10% normal donkey serum (RT, 2 hr). First, the  
438 sections were stained with anti-pSTAT3 antibody (CST #9145S) at RT overnight, and then with  
439 PO-conjugated secondary antibody (Jackson #111-035-144) for 2 hr. pSTAT3 were detected using  
440 DAB-Cobalt substrate kit (Bioenno Tech #003843). Before the second staining step, sections were  
441 boiled in stripping buffer at 98°C for 20 min to inactivate the antibodies. After washing the sections  
442 with PBS and PBS-T, we treated them with 10% normal donkey serum at RT overnight. Finally,  
443 the sections were stained with anti-rodent specific COX IV antibody (CST #38563) at RT  
444 overnight and then PO-conjugated secondary antibody (Jackson #111-035-144) for 2 hr. After  
445 each antibody reaction, sections were washed with PBS-T and PBS (10 min x 3). COX IV was  
446 detected using DAB substrate kit (Abcam #ab64238). After stopping the reaction, the sections  
447 were dehydrated with graded alcohols and xylene and mounted with Malinol.

448 **Immunofluorescence (IF).** Tumor tissue was embedded in OCT compound, snap-frozen and cut  
449 into 6 µm thick sections. CD8<sup>+</sup> T lymphocytes cells were identified by positive staining (overnight  
450 at 4°C) with anti-CD8 (Biorbyt, Saint Louis, MO) followed by incubation with Cy3-conjugated  
451 anti-rabbit antibodies (Jackson ImmunoResearch, West Grove, PA) for 2 hr at RT. Slides were  
452 prepared using ProLong™ Gold Antifade Mountant, and cell nuclei were identified with DAPI  
453 (Thermo Fisher Scientific, MA, Waltham, MA). All images were taken with a confocal microscope  
454 (FLUOVIEW FV1000) (OLYMPUS, Center Valley, PA). For analyses of CD8<sup>+</sup> T cells, the

455 number of cells was counted in 5 random fields under 400× magnification. These data were  
456 analyzed using ImageJ (US NIH).

457 **Statistical analyses.** All analyses were performed using JMP Pro 11.2.0 (SAS Institute Inc., NC)  
458 and data are presented as mean ± S.E.M. Differences between experimental groups were  
459 considered statistically significant for *p*-values of less than 0.05. To compare two groups with  
460 quantitative variables, we used Student's *t* test. When experimental cohort includes more than  
461 three groups with quantitative variables, we used one-way ANOVA with Tukey's multiple  
462 comparisons test. The Kaplan-Meier method was used to generate survival curves and Cox  
463 proportional hazard model was employed to conduct comparison. Hazard ratio (HR) and 95% CI  
464 were calculated for overall survival analyses.

465 **List of Supplementary Materials**

466 Materials and Methods

467 Fig. S1 to S13

468 Table S1 to S2

469 **References**

- 470 1. Mizrahi JD, Surana R, Valle JW, Shroff RT. Pancreatic cancer. *Lancet*. 2020;395:2008-20.
- 471 2. Henley SJ, Ward EM, Scott S, Ma J, Anderson RN, Firth AU, et al. Annual report to the  
472 nation on the status of cancer, part I: National cancer statistics. *Cancer*. 2020;126:2225-49.
- 473 3. Rahib L, Smith BD, Aizenberg R, Rosenzweig AB, Fleshman JM, Matrisian LM.  
474 Projecting cancer incidence and deaths to 2030: the unexpected burden of thyroid, liver, and  
475 pancreas cancers in the United States. *Cancer Res*. 2014;74:2913-21.
- 476 4. Jain T, Dudeja V. The war against pancreatic cancer in 2020 - advances on all fronts. *Nat*  
477 *Rev Gastroenterol Hepatol*. 2021;18:99-100.
- 478 5. Bryant KL, Mancias JD, Kimmelman AC, Der CJ. KRAS: feeding pancreatic cancer  
479 proliferation. *Trends Biochem Sci*. 2014;39:91-100.
- 480 6. Bailey P, Chang DK, Nones K, Johns AL, Patch AM, Gingras MC, et al. Genomic analyses  
481 identify molecular subtypes of pancreatic cancer. *Nature*. 2016;531:47-52.
- 482 7. Waddell N, Pajic M, Patch AM, Chang DK, Kassahn KS, Bailey P, et al. Whole genomes  
483 redefine the mutational landscape of pancreatic cancer. *Nature*. 2015;518:495-501.
- 484 8. Mueller S, Engleitner T, Maresch R, Zukowska M, Lange S, Kaltenbacher T, et al.  
485 Evolutionary routes and KRAS dosage define pancreatic cancer phenotypes. *Nature*. 2018;554:62-  
486 8.
- 487 9. Muthalagu N, Monteverde T, Raffo-Iraolagoitia X, Wiesheu R, Whyte D, Hedley A, et al.  
488 Repression of the Type I Interferon Pathway Underlies MYC- and KRAS-Dependent Evasion of  
489 NK and B Cells in Pancreatic Ductal Adenocarcinoma. *Cancer Discov*. 2020;10:872-87.
- 490 10. Ying H, Kimmelman AC, Lyssiotis CA, Hua S, Chu GC, Fletcher-Sananikone E, et al.  
491 Oncogenic Kras maintains pancreatic tumors through regulation of anabolic glucose metabolism.

- 492 Cell. 2012;149:656-70.
- 493 11. Tape CJ, Ling S, Dimitriadi M, McMahon KM, Worboys JD, Leong HS, et al. Oncogenic  
494 KRAS Regulates Tumor Cell Signaling via Stromal Reciprocity. Cell. 2016;165:1818.
- 495 12. Canon J, Rex K, Saiki AY, Mohr C, Cooke K, Bagal D, et al. The clinical KRAS(G12C)  
496 inhibitor AMG 510 drives anti-tumour immunity. Nature. 2019;575:217-23.
- 497 13. Hong DS, Fakih MG, Strickler JH, Desai J, Durm GA, Shapiro GI, et al. KRAS. N Engl J  
498 Med. 2020;383:1207-17.
- 499 14. Stephen AG, Esposito D, Bagni RK, McCormick F. Dragging ras back in the ring. Cancer  
500 Cell. 2014;25:272-81.
- 501 15. Buscail L, Bournet B, Cordelier P. Role of oncogenic KRAS in the diagnosis, prognosis  
502 and treatment of pancreatic cancer. Nat Rev Gastroenterol Hepatol. 2020;17:153-68.
- 503 16. Hong TS, Ryan DP, Borger DR, Blaszkowsky LS, Yeap BY, Ancukiewicz M, et al. A phase  
504 1/2 and biomarker study of preoperative short course chemoradiation with proton beam therapy  
505 and capecitabine followed by early surgery for resectable pancreatic ductal adenocarcinoma. Int J  
506 Radiat Oncol Biol Phys. 2014;89:830-8.
- 507 17. Ogura T, Yamao K, Hara K, Mizuno N, Hijioka S, Imaoka H, et al. Prognostic value of K-  
508 ras mutation status and subtypes in endoscopic ultrasound-guided fine-needle aspiration specimens  
509 from patients with unresectable pancreatic cancer. J Gastroenterol. 2013;48:640-6.
- 510 18. Bournet B, Muscari F, Buscail C, Assenat E, Barthet M, Hammel P, et al. KRAS G12D  
511 Mutation Subtype Is A Prognostic Factor for Advanced Pancreatic Adenocarcinoma. Clin Transl  
512 Gastroenterol. 2016;7:e157.
- 513 19. Hamidi H, Lu M, Chau K, Anderson L, Fejzo M, Ginther C, et al. KRAS mutational  
514 subtype and copy number predict in vitro response of human pancreatic cancer cell lines to MEK



- 515 inhibition. *Br J Cancer*. 2014;111:1788-801.
- 516 20. Brandt R, Sell T, Lüthen M, Uhlitz F, Klinger B, Riemer P, et al. Cell type-dependent  
517 differential activation of ERK by oncogenic KRAS in colon cancer and intestinal epithelium. *Nat*  
518 *Commun*. 2019;10:2919.
- 519 21. Manning BD, Toker A. AKT/PKB Signaling: Navigating the Network. *Cell*.  
520 2017;169:381-405.
- 521 22. Owen KL, Brockwell NK, Parker BS. JAK-STAT Signaling: A Double-Edged Sword of  
522 Immune Regulation and Cancer Progression. *Cancers (Basel)*. 2019;11.
- 523 23. Villarino AV, Kanno Y, O'Shea JJ. Mechanisms and consequences of Jak-STAT signaling  
524 in the immune system. *Nat Immunol*. 2017;18:374-84.
- 525 24. Booy S, Hofland L, van Eijck C. Potentials of interferon therapy in the treatment of  
526 pancreatic cancer. *J Interferon Cytokine Res*. 2015;35(5):327-39.
- 527 25. Regis G, Pensa S, Boselli D, Novelli F, Poli V. Ups and downs: the STAT1:STAT3 seesaw  
528 of Interferon and gp130 receptor signalling. *Semin Cell Dev Biol*. 2008;19:351-9.
- 529 26. Bromberg JF. Activation of STAT proteins and growth control. *Bioessays*. 2001;23:161-9.
- 530 27. Plataniias LC. Mechanisms of type-I- and type-II-interferon-mediated signalling. *Nat Rev*  
531 *Immunol*. 2005;5:375-86.
- 532 28. Verhoeven Y, Tilborghs S, Jacobs J, De Waele J, Quatannens D, Deben C, et al. The  
533 potential and controversy of targeting STAT family members in cancer. *Semin Cancer Biol*.  
534 2020;60:41-56.
- 535 29. Koromilas AE, Sixel V. The tumor suppressor function of STAT1 in breast cancer.  
536 *JAKSTAT*. 2013;2:e23353.
- 537 30. Musella M, Manic G, De Maria R, Vitale I, Sistigu A. Type-I-interferons in infection and

- 538 cancer: Unanticipated dynamics with therapeutic implications. *Oncoimmunology*.  
539 2017;6:e1314424.
- 540 31. Zhu Y, Karakhanova S, Huang X, Deng SP, Werner J, Bazhin AV. Influence of interferon-  
541  $\alpha$  on the expression of the cancer stem cell markers in pancreatic carcinoma cells. *Exp Cell Res*.  
542 2014;324:146-56.
- 543 32. Mazewski C, Perez RE, Fish EN, Platanius LC. Type I Interferon (IFN)-Regulated  
544 Activation of Canonical and Non-Canonical Signaling Pathways. *Front Immunol*. 2020;11:606456.
- 545 33. Solorzano CC, Hwang R, Baker CH, Bucana CD, Pisters PW, Evans DB, et al.  
546 Administration of optimal biological dose and schedule of interferon alpha combined with  
547 gemcitabine induces apoptosis in tumor-associated endothelial cells and reduces growth of human  
548 pancreatic carcinoma implanted orthotopically in nude mice. *Clin Cancer Res*. 2003;9:1858-67.
- 549 34. Miyake K, Tsuchida K, Sugino H, Imura S, Morine Y, Fujii M, et al. Combination therapy  
550 of human pancreatic cancer implanted in nude mice by oral fluoropyrimidine anticancer agent (S-  
551 1) with interferon-alpha. *Cancer Chemother Pharmacol*. 2007;59:113-26.
- 552 35. Wagener DJ, Wils JA, Kok TC, Planting A, Couvreur ML, Baron B. Results of a  
553 randomised phase II study of cisplatin plus 5-fluorouracil versus cisplatin plus 5-fluorouracil with  
554 alpha-interferon in metastatic pancreatic cancer: an EORTC gastrointestinal tract cancer group trial.  
555 *Eur J Cancer*. 2002;38:648-53.
- 556 36. Ohman KA, Liu J, Linehan DC, Tan MC, Tan BR, Fields RC, et al. Interferon-based  
557 chemoradiation followed by gemcitabine for resected pancreatic adenocarcinoma: long-term  
558 follow-up. *HPB (Oxford)*. 2017;19:449-57.
- 559 37. Schmidt J, Abel U, Debus J, Harig S, Hoffmann K, Herrmann T, et al. Open-label,  
560 multicenter, randomized phase III trial of adjuvant chemoradiation plus interferon Alfa-2b versus

- 561 fluorouracil and folinic acid for patients with resected pancreatic adenocarcinoma. *J Clin Oncol.*  
562 2012;30:4077-83.
- 563 38. Katz MH, Wolff R, Crane CH, Varadhachary G, Javle M, Lin E, et al. Survival and quality  
564 of life of patients with resected pancreatic adenocarcinoma treated with adjuvant interferon-based  
565 chemoradiation: a phase II trial. *Ann Surg Oncol.* 2011;18:3615-22.
- 566 39. Tang Z, Li C, Kang B, Gao G, Zhang Z. GEPIA: a web server for cancer and normal gene  
567 expression profiling and interactive analyses. *Nucleic Acids Res.* 2017;45:W98-W102.
- 568 40. Parker BS, Rautela J, Hertzog PJ. Antitumour actions of interferons: implications for  
569 cancer therapy. *Nat Rev Cancer.* 2016;16:131-44.
- 570 41. Hsu P, Santner-Nanan B, Hu M, Skarratt K, Lee CH, Stormon M, et al. IL-10 Potentiates  
571 Differentiation of Human Induced Regulatory T Cells via STAT3 and Foxo1. *J Immunol.*  
572 2015;195:3665-74.
- 573 42. Incio J, Liu H, Suboj P, Chin SM, Chen IX, Pinter M, et al. Obesity-Induced Inflammation  
574 and Desmoplasia Promote Pancreatic Cancer Progression and Resistance to Chemotherapy. *Cancer*  
575 *Discov.* 2016;6:852-69.
- 576 43. Chauhan VP, Martin JD, Liu H, Lacorre DA, Jain SR, Kozin SV, et al. Angiotensin  
577 inhibition enhances drug delivery and potentiates chemotherapy by decompressing tumour blood  
578 vessels. *Nat Commun.* 2013;4:2516.
- 579 44. Shiraishi D, Fujiwara Y, Horlad H, Saito Y, Iriki T, Tsuboki J, et al. CD163 Is Required for  
580 Protumoral Activation of Macrophages in Human and Murine Sarcoma. *Cancer Res.*  
581 2018;78:3255-66.
- 582 45. Sun D, Wang J, Han Y, Dong X, Ge J, Zheng R, et al. TISCH: a comprehensive web  
583 resource enabling interactive single-cell transcriptome visualization of tumor microenvironment.

584 Nucleic Acids Res. 2021;49:D1420-D30.

585 46. Wilson EB, Yamada DH, Elsaesser H, Herskovitz J, Deng J, Cheng G, et al. Blockade of  
586 chronic type I interferon signaling to control persistent LCMV infection. *Science*. 2013;340:202-  
587 7.

588 47. Teijaro JR, Ng C, Lee AM, Sullivan BM, Sheehan KC, Welch M, et al. Persistent LCMV  
589 infection is controlled by blockade of type I interferon signaling. *Science*. 2013;340:207-11.

590 48. Borden EC. Interferons  $\alpha$  and  $\beta$  in cancer: therapeutic opportunities from new insights. *Nat*  
591 *Rev Drug Discov*. 2019;18:219-34.

592 49. Samarajiwa SA, Forster S, Auchettl K, Hertzog PJ. INTERFEROME: the database of  
593 interferon regulated genes. *Nucleic Acids Res*. 2009;37:D852-7.

594 50. Li S, Xie Y, Zhang W, Gao J, Wang M, Zheng G, et al. Interferon alpha-inducible protein  
595 27 promotes epithelial-mesenchymal transition and induces ovarian tumorigenicity and stemness.  
596 *J Surg Res*. 2015;193:255-64.

597 51. van Boxel-Dezaire AH, Rani MR, Stark GR. Complex modulation of cell type-specific  
598 signaling in response to type I interferons. *Immunity*. 2006;25:361-72.

599 52. Provance OK, Lewis-Wambi J. Deciphering the role of interferon alpha signaling and  
600 microenvironment crosstalk in inflammatory breast cancer. *Breast Cancer Res*. 2019;21:59.

601 53. Pfeffer LM. The role of nuclear factor  $\kappa$ B in the interferon response. *J Interferon Cytokine*  
602 *Res*. 2011;31:553-9.

603 54. Bardeesy N, Aguirre AJ, Chu GC, Cheng KH, Lopez LV, Hezel AF, et al. Both p16(Ink4a)  
604 and the p19(Arf)-p53 pathway constrain progression of pancreatic adenocarcinoma in the mouse.  
605 *Proc Natl Acad Sci U S A*. 2006;103:5947-52.

606 55. Banerjee S, Nomura A, Sangwan V, Chugh R, Dudeja V, Vickers SM, et al. CD133+ tumor

- 607 initiating cells in a syngenic murine model of pancreatic cancer respond to Minnelide. *Clin Cancer*  
608 *Res.* 2014;20:2388-99.
- 609 56. Fu Y, Sander JD, Reyon D, Cascio VM, Joung JK. Improving CRISPR-Cas nuclease  
610 specificity using truncated guide RNAs. *Nat Biotechnol.* 2014;32:279-84.
- 611 57. Liang X, Potter J, Kumar S, Zou Y, Quintanilla R, Sridharan M, et al. Rapid and highly  
612 efficient mammalian cell engineering via Cas9 protein transfection. *J Biotechnol.* 2015;208:44-53.
- 613 58. Bruns CJ, Harbison MT, Kuniyasu H, Eue I, Fidler IJ. In vivo selection and characterization  
614 of metastatic variants from human pancreatic adenocarcinoma by using orthotopic implantation in  
615 nude mice. *Neoplasia.* 1999;1:50-62.
- 616 59. Kim D, Paggi JM, Park C, Bennett C, Salzberg SL. Graph-based genome alignment and  
617 genotyping with HISAT2 and HISAT-genotype. *Nat Biotechnol.* 2019;37:907-15.
- 618 60. Kim D, Langmead B, Salzberg SL. HISAT: a fast spliced aligner with low memory  
619 requirements. *Nat Methods.* 2015;12:357-60.
- 620 61. Pertea M, Kim D, Pertea GM, Leek JT, Salzberg SL. Transcript-level expression analysis  
621 of RNA-seq experiments with HISAT, StringTie and Ballgown. *Nat Protoc.* 2016;11:1650-67.
- 622 62. Li H, Handsaker B, Wysoker A, Fennell T, Ruan J, Homer N, et al. The Sequence  
623 Alignment/Map format and SAMtools. *Bioinformatics.* 2009;25:2078-9.
- 624 63. Anders S, Pyl PT, Huber W. HTSeq--a Python framework to work with high-throughput  
625 sequencing data. *Bioinformatics.* 2015;31:166-9.
- 626 64. Robinson MD, McCarthy DJ, Smyth GK. edgeR: a Bioconductor package for differential  
627 expression analysis of digital gene expression data. *Bioinformatics.* 2010;26:139-40.
- 628 65. McCarthy DJ, Chen Y, Smyth GK. Differential expression analysis of multifactor RNA-  
629 Seq experiments with respect to biological variation. *Nucleic Acids Res.* 2012;40:4288-97.

- 630 66. Huang dW, Sherman BT, Lempicki RA. Bioinformatics enrichment tools: paths toward the  
631 comprehensive functional analysis of large gene lists. *Nucleic Acids Res.* 2009;37:1-13.
- 632 67. Huang dW, Sherman BT, Lempicki RA. Systematic and integrative analysis of large gene  
633 lists using DAVID bioinformatics resources. *Nat Protoc.* 2009;4:44-57.
- 634

635 **Notes**

636 **Acknowledgments:** The authors thank Sylvie Roberge and Anna Khachatryan and Mark Duquette  
637 (MGH) for outstanding technical support and Drs. Cyril Benes and J. Keith Joung (MGH) for  
638 useful discussions.

639 **Funding:**

640 Samuel Singer Brown Fund for Pancreatic Ductal Adenocarcinoma Research (DGD)  
641 Andrew L. Warshaw, MD Institute for Pancreatic Cancer Research Grant (DGD)  
642 NCI Proton Beam/Federal Share Program grant (DGD)  
643 National Institutes of Health grant R01CA247441 (DGD, LLM)  
644 National Institutes of Health grant R01CA260872 (DGD)  
645 National Institutes of Health grant R01CA260857 (DGD)  
646 National Institutes of Health grant R03CA256764 (DGD)  
647 National Institutes of Health grant U01CA224348 (RKJ)  
648 Department of Defense grant W81XWH-19-1-0284 (DGD)  
649 Department of Defense grant W81XWH-21-1-0738 (DGD)  
650 Humboldt Foundation National Postdoctoral Fellowship (DHS)  
651 Boehringer Ingelheim Fonds MD Fellowship (AK)  
652 Fondation René Touraine Fellowship (GG)  
653 Cells in Motion cluster of excellence of Münster University Fellowship (GG)  
654 German National Merit Foundation Fellowship (GG)

655  
656 The funders had no role in the preparation of this article.

657 **Author contributions:**

658 Conceptualization: KI, DHS, TSH, RKJ, NB, DGD  
659 Methodology: KI, DHS, AM, PL, SK, SA, HT, SQT, GG, AK, DF, PH, TS, CFdC,  
660 RKJ, AL, NB, DGD  
661 Investigation: KI, DHS, AM, PL, SK, SA, HT, HK, JC, ZL, TCES, MI, GG, AK  
662 Visualization: KI, DHS, AM, PL, LLM, DGD  
663 Funding acquisition: DHS, AK, EM, GG, LLM, DGD  
664 Project administration: DGD  
665 Supervision: DGD  
666 Writing – original draft: KI, HT, DGD  
667 Writing – review & editing: All authors

668 **Competing interests:** RKJ received Consultant fees from Elpis, Innocoll, SPARC, SynDevRx;  
669 owns equity in Accurius, Enlight, SynDevRx; Serves on the Board of Trustees of Tekla  
670 Healthcare Investors, Tekla Life Sciences Investors, Tekla Healthcare Opportunities  
671 Fund, Tekla World Healthcare Fund and received a Research Grant from Boehringer  
672 Ingelheim. LLM's spouse is an employee of Bayer. DGD received consultant fees from  
673 Innocoll and research grants from Bayer, Surface Oncology, Exelixis and BMS. No  
674 reagents or support from these companies was used for this study. No potential conflicts  
675 of interest were disclosed by other authors.

676 **Data and materials availability:** All data are available in the main text or the supplementary  
677 materials.

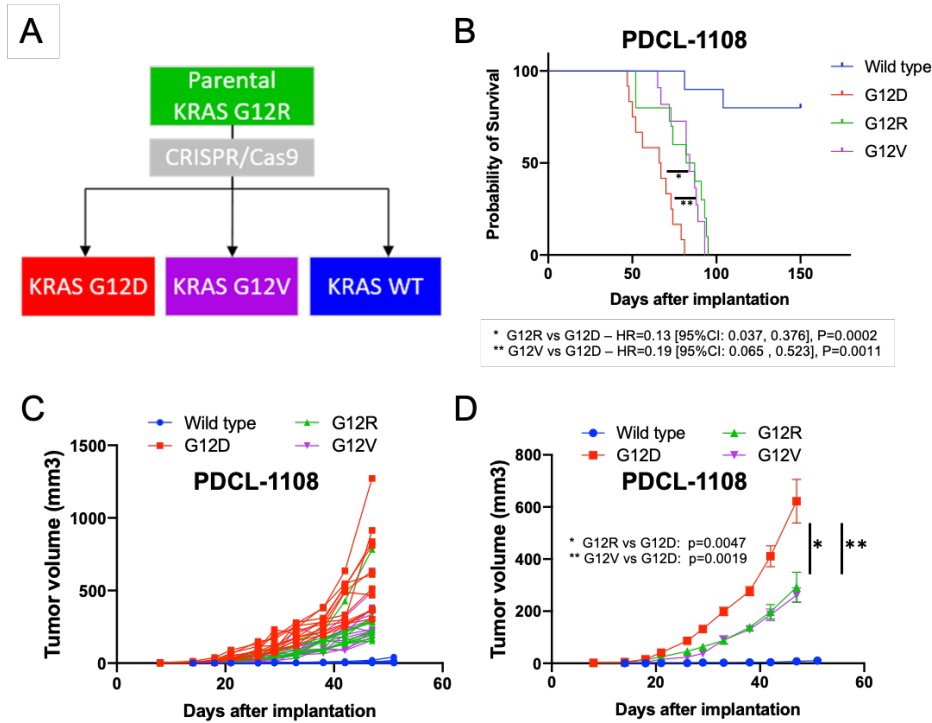

**Fig. 1: Isogenic PDAC cells with different *KRAS* alleles show differential tumor progression.** (A) Schema showing isogenic cell lines established by CRISPR/Cas9 technology. (B) Kaplan-Meier curve depicting mouse survival. Individual growth curves in (C) and average tumor size with SEM in surviving mice in (D). Cancer cells were implanted into NSG-human-HGF-knock-in mice. G12D: n=12; G12R: n=10; G12V: n=12; wild type: n=10; n refers to biological replicates. Tukey's test for tumor volume and Cox regression test for Kaplan-Meier survival distributions.



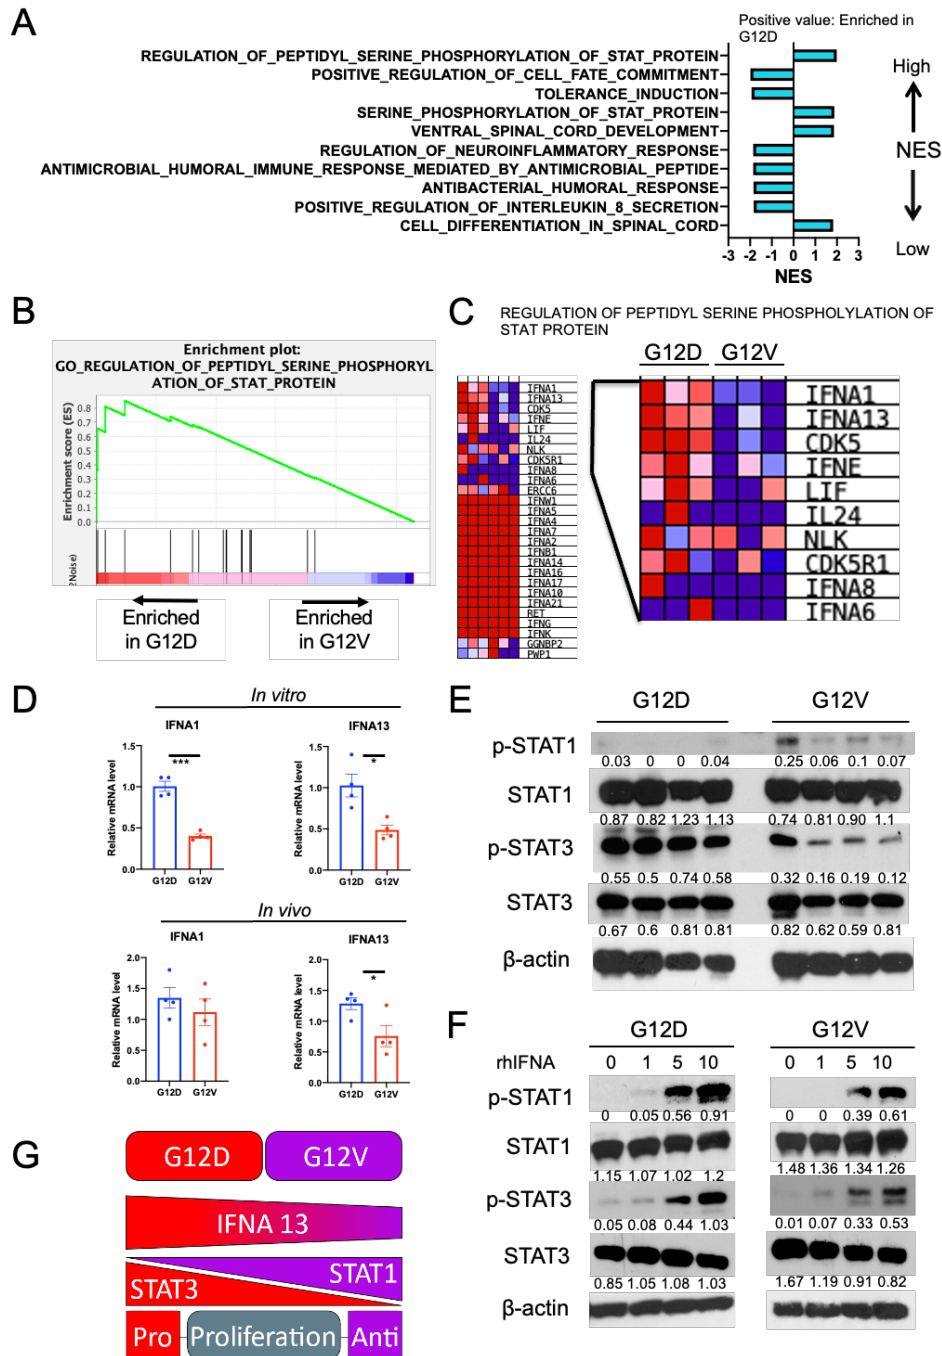

**Fig. 2: Interferon alpha (IFNA) mediates the activation of STAT3 in  $KRAS^{G12D}$  PDXs of PDAC.** (A-C) Gene Set Enrichment Analysis (GSEA) analysis of RNA-seq data (G12D versus G12V); data mapped to the human genome (hg38). G12D: n=3; G12V: n=3; n refers to biological replicates. (A) Gene Ontology (GO) term list showing top ten GO terms according to Normalized Enrichment Score (NES). (B) Enrichment plot of regulation of peptidyl serine phosphorylation of STAT protein. NES: 1.99, False discovery rate (FDR): 0.07 (C) Heatmap of “regulation of peptidyl serine phosphorylation of STAT protein” gene set enriched in  $KRAS^{G12D}$ . Red, high, blue, low. (D) Human IFNA 1 and IFNA13 expression in cells and tumor tissues measured by real-time qPCR. Mean relative mRNA level is indicated with error bars representing SEM. All *in vitro* assays, n=3-4; for *in vivo* analyses n=4. \* $p < 0.05$ , \*\*\* $p < 0.001$  from Student’s t test. (E) STATs expression in tumor tissue. Total and phosphorylated STAT1 and STAT3 were measured by Western blotting. G12D: n=4; G12V: n=4. Representative of two or more independent experiments. (F) Response of STATs to different doses of recombinant human IFNA. Total and phosphorylated STAT1 and STAT3 in cells were measured by Western blotting. Cells were treated with different concentration of recombinant human IFNA. Representative of two or more independent experiments. (G) Schematic representation showing STAT1, STAT3 and IFNA expression between the G12D and G12V alleles.

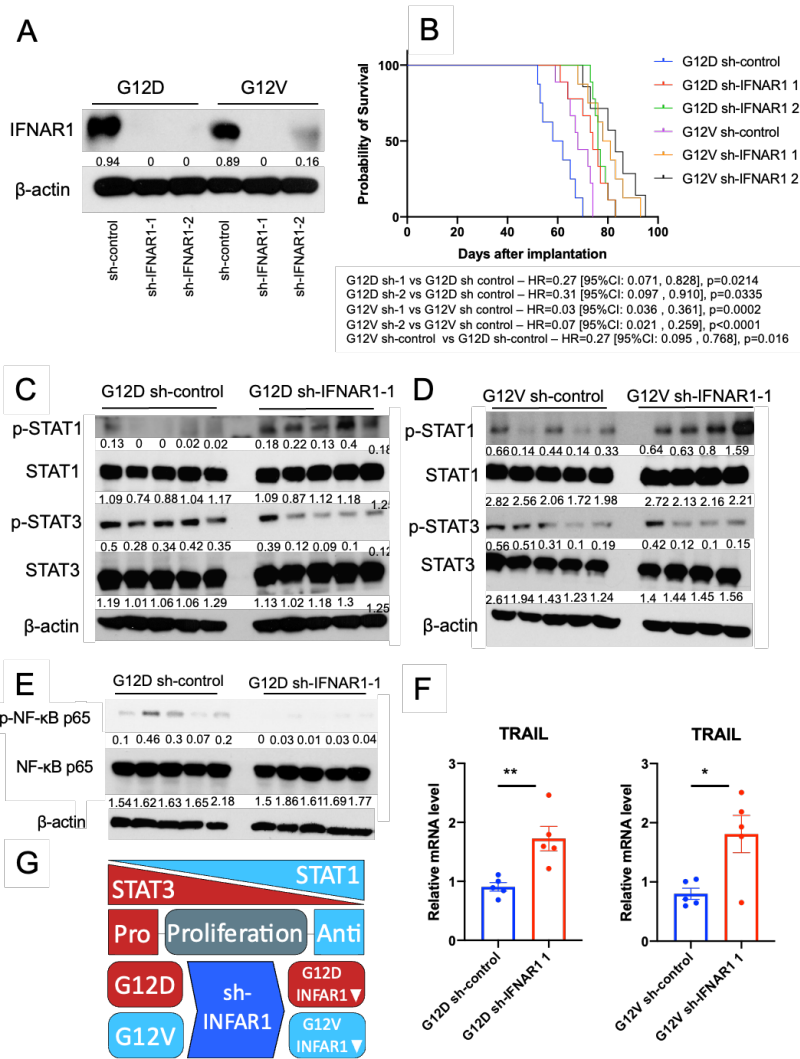

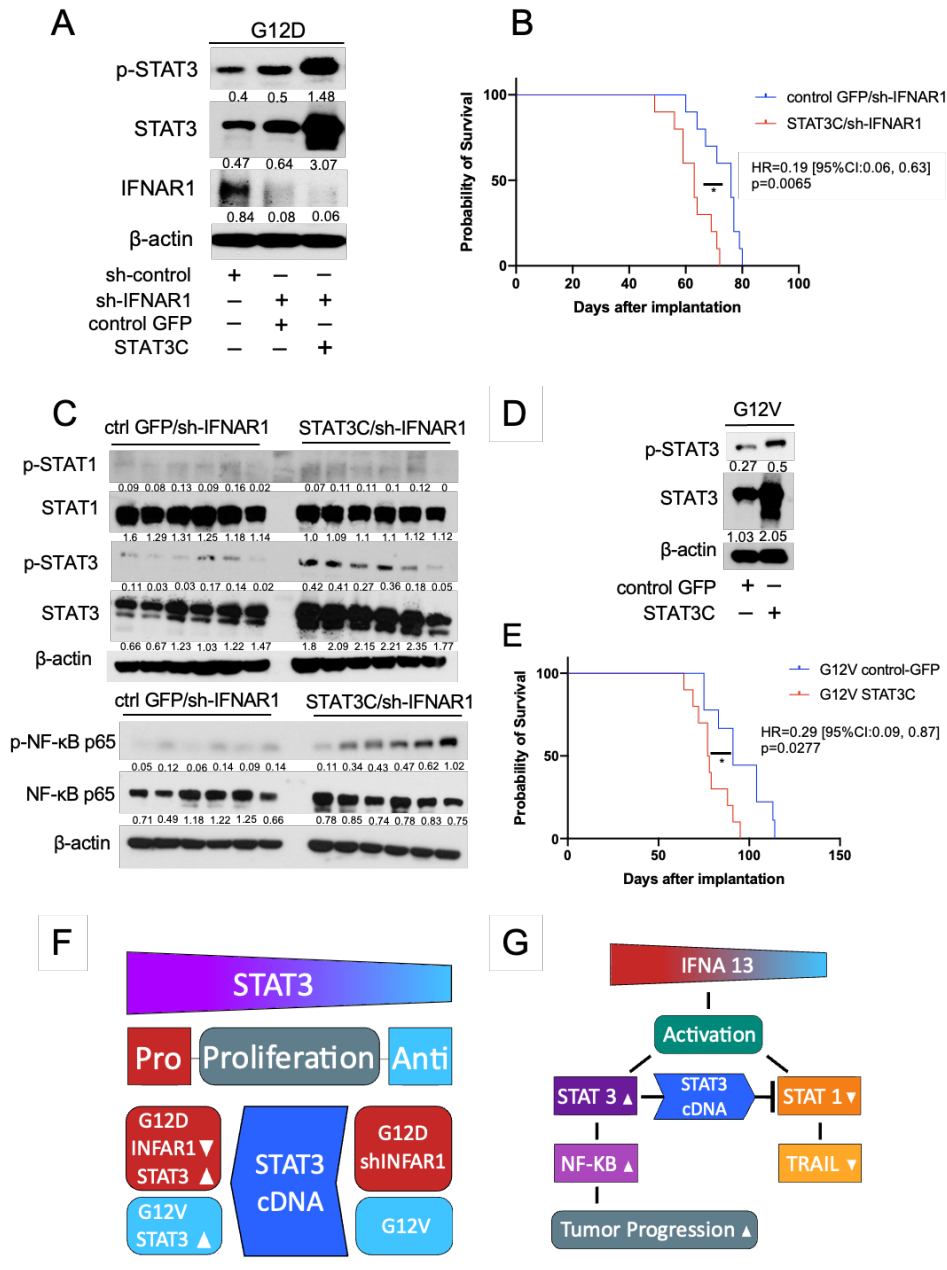

**Fig. 4: STAT3 overexpression promotes PDAC progression.** (A) Validation of STAT3 overexpression. IFNAR1-silenced *KRAS*<sup>G12D</sup> cells were transfected with constitutively active STAT3 mutant (EF.STAT3C.Ubc.GFP) or control GFP (pLVE-eGFP). GFP positive cells were collected by cell sorting 7 days after transfection. Total and phosphorylated (P)-STAT3 and IFNAR1 in *KRAS*<sup>G12D</sup> cells were measured by Western blotting. Representative of two or more independent experiments. (B) Kaplan-Meier survival distributions in NSG-human-HGF-knock-in mice bearing orthotopic PDAC. G12D control GFP/ sh-IFNAR1 1: n=10; G12D control GFP/ sh-IFNAR1 1: n=10; n refers to biological replicates. p values from Cox regression test. (C) Total and p-STAT1, STAT3 and NF-κB p65 expression level in tumor tissue. Control GFP/sh-IFNAR1: n=6; STAT3C/sh-IFNAR1: n=6. Representative of two or more independent experiments. (D) Validation of STAT3 overexpression. *KRAS*<sup>G12V</sup> cells were transfected with constitutively active STAT3 mutant (EF.STAT3C.Ubc.GFP) or control GFP (pLVE-eGFP). Representative of two or more independent experiments. (E) survival distributions in NSG-human-HGF-knock-in mice bearing orthotopic PDAC. G12V control GFP: n=9; G12V STAT3C: n=10. p values from Cox regression test. (F) Schematic representation of STAT3 role in mutant *KRAS* subsets tumor progression. (G) Model indicating the mechanism by which *KRAS* alleles differentially mediate tumor progression.

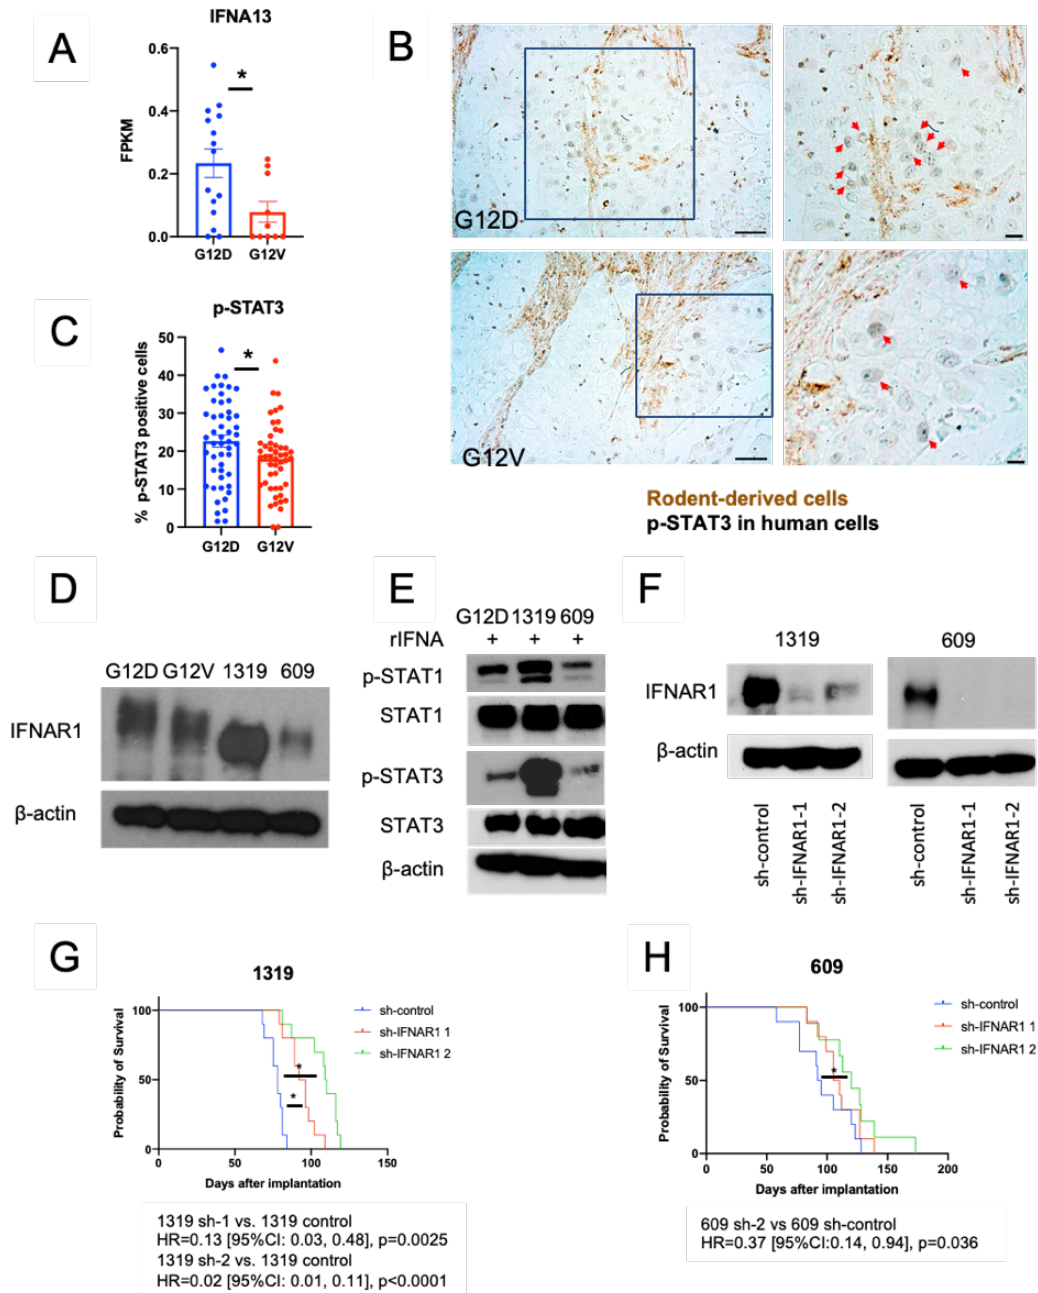

**Fig. 5: KRAS<sup>G12D</sup> PDACs have higher IFNA and pSTAT3 expression, and IFNAR1 expression level inversely correlates with tumor progression.** (A) Normalized RNA-seq reads of human IFNA13 in PDX tumor tissues; FPKM; fragments per kilobase of exon model per million reads mapped; G12D: n=15, G12V: n=10; n refers number of PDX tumor. \*p<0.05 from Student's t test. (B-C) Representative immunohistochemical staining (B) and quantification (C) for p-STAT3 expression in the human PDAC cells; G12D: n=5, G12V: n=5. Scalebar, left panel 1mm, right panel inserts, 250 $\mu$ m. \*p<0.05 from Student's t test. (D) IFNAR1 expression level in 5 PDCLs evaluated by Western blotting. Representative of two or more independent experiments. (E) Effects of exposure to recombinant (r) human IFNA (5 ng/ml) in PDCL1319 and PDCL609 KRAS<sup>G12D</sup> cells. Total and phosphorylated (p)-STAT1 and STAT3 in cells were measured by Western blotting. Representative of at least two experimental repeats. (F) Validation of IFNAR1 expression by Western blotting. Representative of at least two experimental repeats. (G-H) Kaplan-Meier survival distributions in NSG mice bearing orthotopic tumors. 1319 sh-control: n=10; 1319 sh-IFNAR1 1: n=9; 1319 sh-IFNAR1 2: n=10 (G); 609 sh-control: n=10; 609 sh-IFNAR1 1: n=10; 609 sh-IFNAR1 2: n=10 (H). p values from Cox regression test.

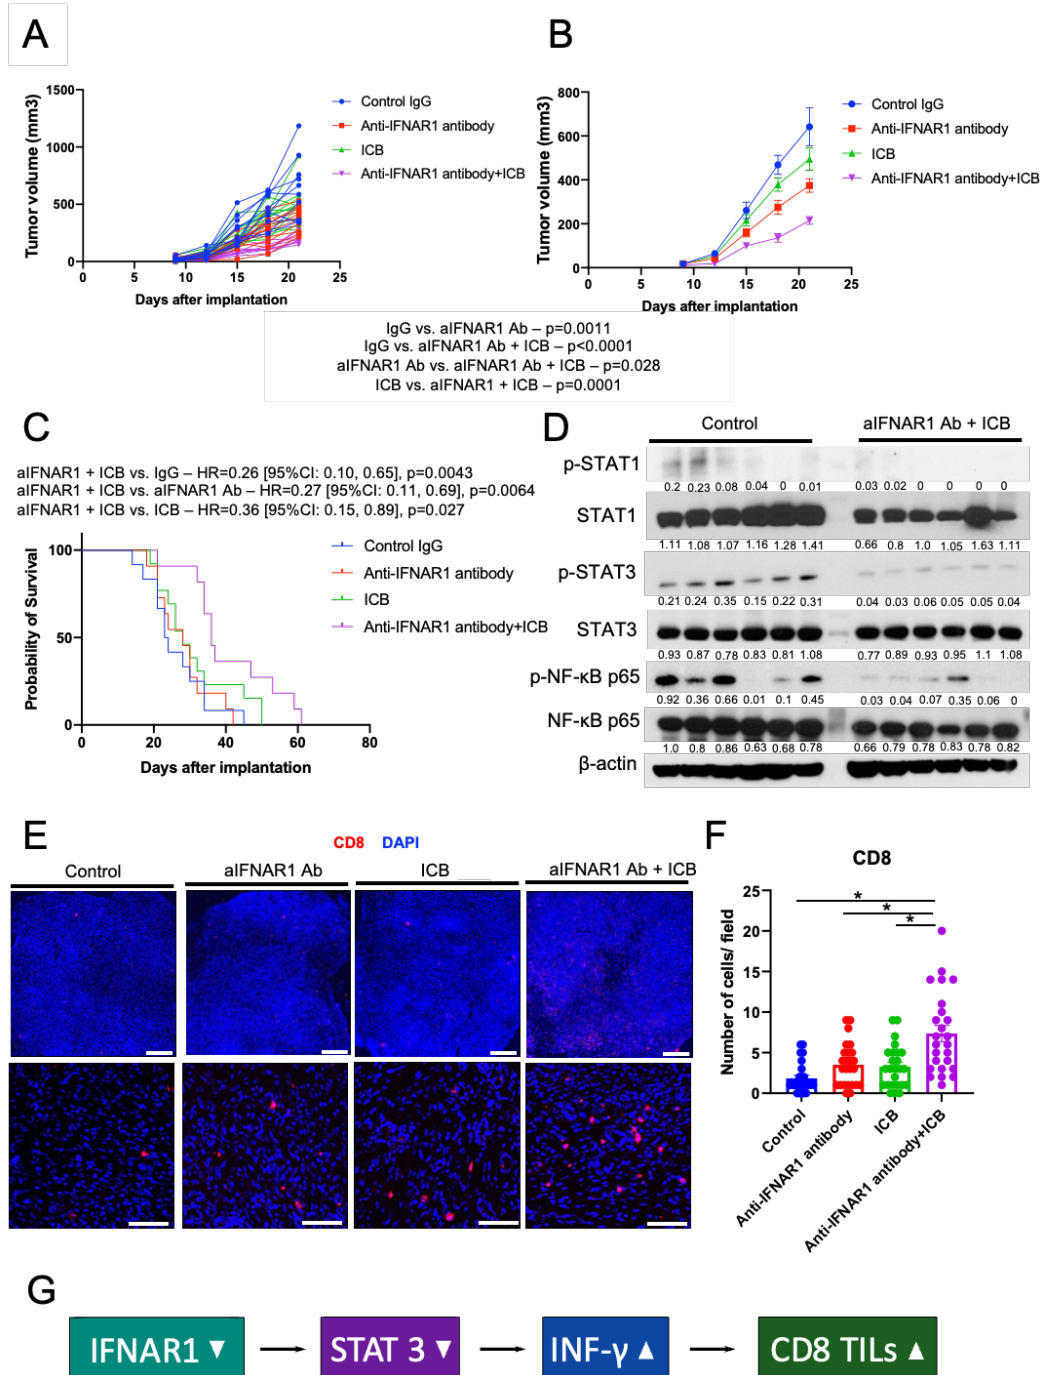

**Fig. 6: Targeting IFNAR1 renders murine PDAC responsive to immune checkpoint blockade (ICB) therapy.** (A-C) Orthotopic tumor growth after AK4.4 implantation in FVB mice, and treatment of established tumors with either: anti-(a)IFNAR1 antibody (Ab), ICB with anti-PD1 and anti-CTLA4 antibodies, their combination, or control IgG (n=11-13 mice per group); n refers to biological replicates. Individual tumor growth curves are shown in (A) and average tumor size in (B); p value from Tukey's test. (C) Kaplan-Meier survival. Distributions in the 4 treatment arms; p from Tukey's test for tumor volume and HR from Cox regression test. (D) Total and phosphorylated (p)-STAT1, STAT3 and NF-κB p65 expression levels in tumor tissue. Representative of two or more independent experiments. Control: n=6; aIFNAR1 Ab + ICB: n=6. (E) Immunofluorescence (IF) for CD8 in tumor tissues. Scale bars are 500 μm (upper panel) and 50 μm (lower panel). (F) Quantification of CD8<sup>+</sup> cells in tumor tissue using IF. Control IgG: n=5; a-IFNAR1 Ab: n=5; ICB: n=5; aIFNAR1Ab + ICB: n=5. \* $p<0.05$  from Tukey's test. (G) Schematic representation showing IFNAR1 blockade enhancement of immunotherapy efficacy.
